# Supplementary material for: Synthesis of 2-nitro-3-(pyrrol-1-yl)-5,10,15,20-tetraarylporphyrins via a Clauson-Kaas reaction and the study of their electronic properties
Source: Royal Society of Chemistry journal article supplement (doi:10.1039/c5nj00014a), 2015-01-01
Supplement: c5nj00014a1.pdf [file c5nj00014a1.pdf]

## Supporting Information

### **Synthesis of 2-nitro-3-(pyrrol-1-yl)-5,10,15,20-tetraarylporphyrins via a Clauson-Kaas reaction and the study of their electronic properties†**

**Raju Tiwari and Mahendra Nath\***

Department of Chemistry, University of Delhi, Delhi 110007, India,

E-mail: [mnath@chemistry.du.ac.in](mailto:mnath@chemistry.du.ac.in); Fax:+91-11-27666605

#### **Table of contents:**

|                                                                                    |       |
|------------------------------------------------------------------------------------|-------|
| Figure S1. <sup>1</sup> H NMR spectrum of porphyrin <b>8</b>                       | 2     |
| Figure S2. <sup>1</sup> H NMR spectrum of porphyrin <b>10</b>                      | 3     |
| Figure S3. <sup>1</sup> H NMR spectrum of porphyrin <b>12</b>                      | 4     |
| Figure S4. <sup>1</sup> H NMR spectrum of porphyrin <b>14</b>                      | 5     |
| Figure S5. <sup>1</sup> H NMR spectrum of porphyrin <b>16</b>                      | 6     |
| Figure S6. <sup>1</sup> H NMR spectrum of porphyrin <b>17</b>                      | 7     |
| Figure S 7. ESI-HRMS spectrum of porphyrin <b>3</b>                                | 8     |
| Figure S 8. ESI-HRMS spectrum of porphyrin <b>7</b>                                | 9     |
| Figure S 9. ESI-HRMS spectrum of porphyrin <b>8</b>                                | 10    |
| Figure S 10. ESI-HRMS spectrum of porphyrin <b>9</b>                               | 11    |
| Figure S 11. ESI-HRMS spectrum of porphyrin <b>10</b>                              | 12    |
| Figure S 12. ESI-HRMS spectrum of porphyrin <b>12</b>                              | 13    |
| Figure S 13. ESI-HRMS spectrum of porphyrin <b>13</b>                              | 14    |
| Figure S 14. ESI-HRMS spectrum of porphyrin <b>14</b>                              | 15    |
| Figure S 15. ESI-HRMS spectrum of porphyrin <b>15</b>                              | 16    |
| Figure S 16. ESI-HRMS spectrum of porphyrin <b>16</b>                              | 17    |
| Figure S 17. ESI-HRMS spectrum of porphyrin <b>17</b>                              | 18    |
| Figure S 18. ESI-HRMS spectrum of porphyrin <b>18</b>                              | 19    |
| Figure S 19. UV-Vis spectra of porphyrins ( <b>9, 10, 12 and 15</b> )              | 20    |
| Figure S 20. UV-Vis spectra of porphyrins ( <b>13, 14, 16, 17 and 18</b> )         | 21    |
| Figure S 21-25. Cyclic voltammograms of porphyrins ( <b>9, 10, 12, 14 and 16</b> ) | 22-26 |

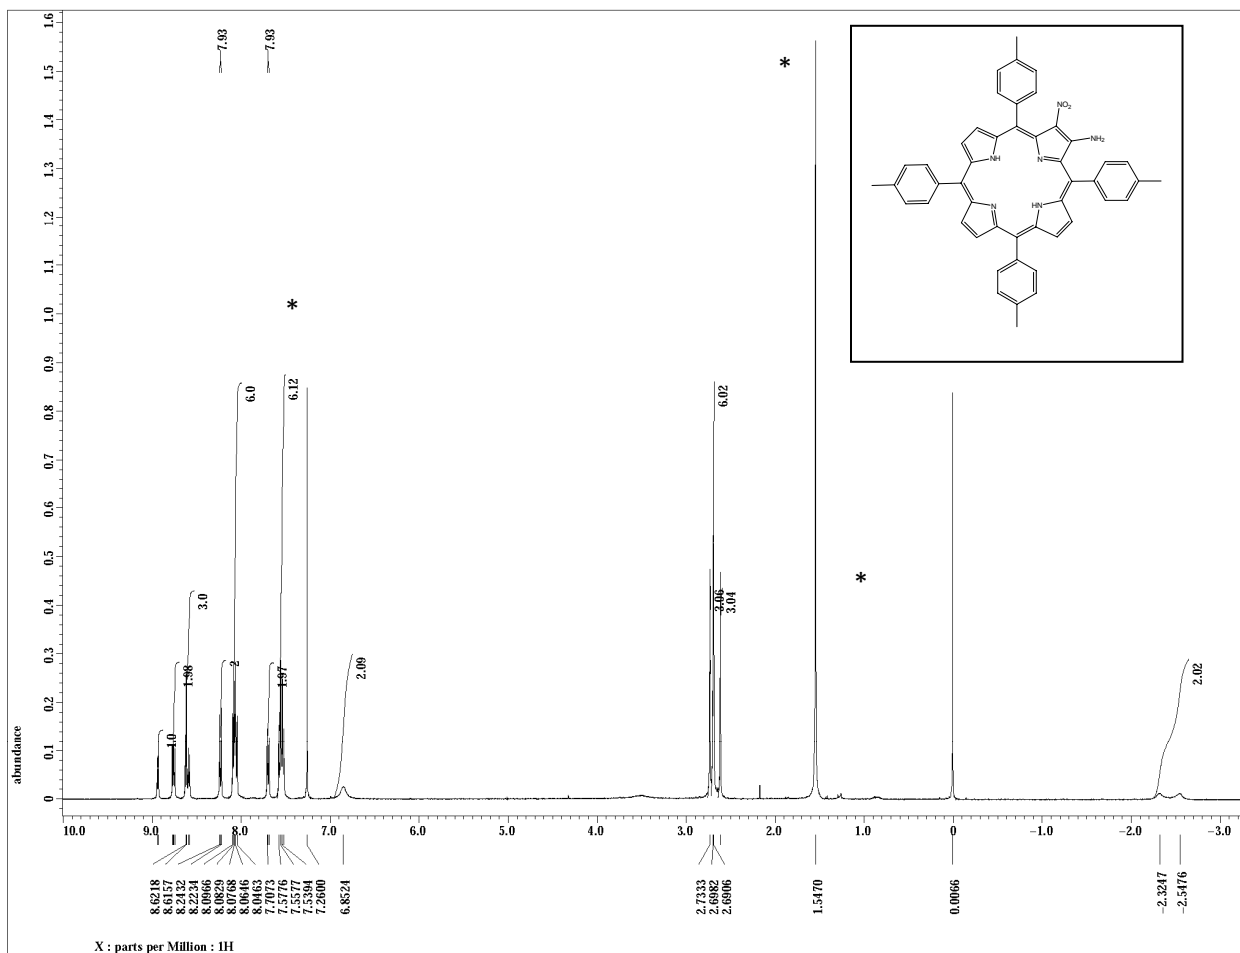

\*solvent and impurities

Figure S1. <sup>1</sup>H NMR spectrum of 2-amino-3-nitro-tetra-*p*-tolylporphyrin (**8**).

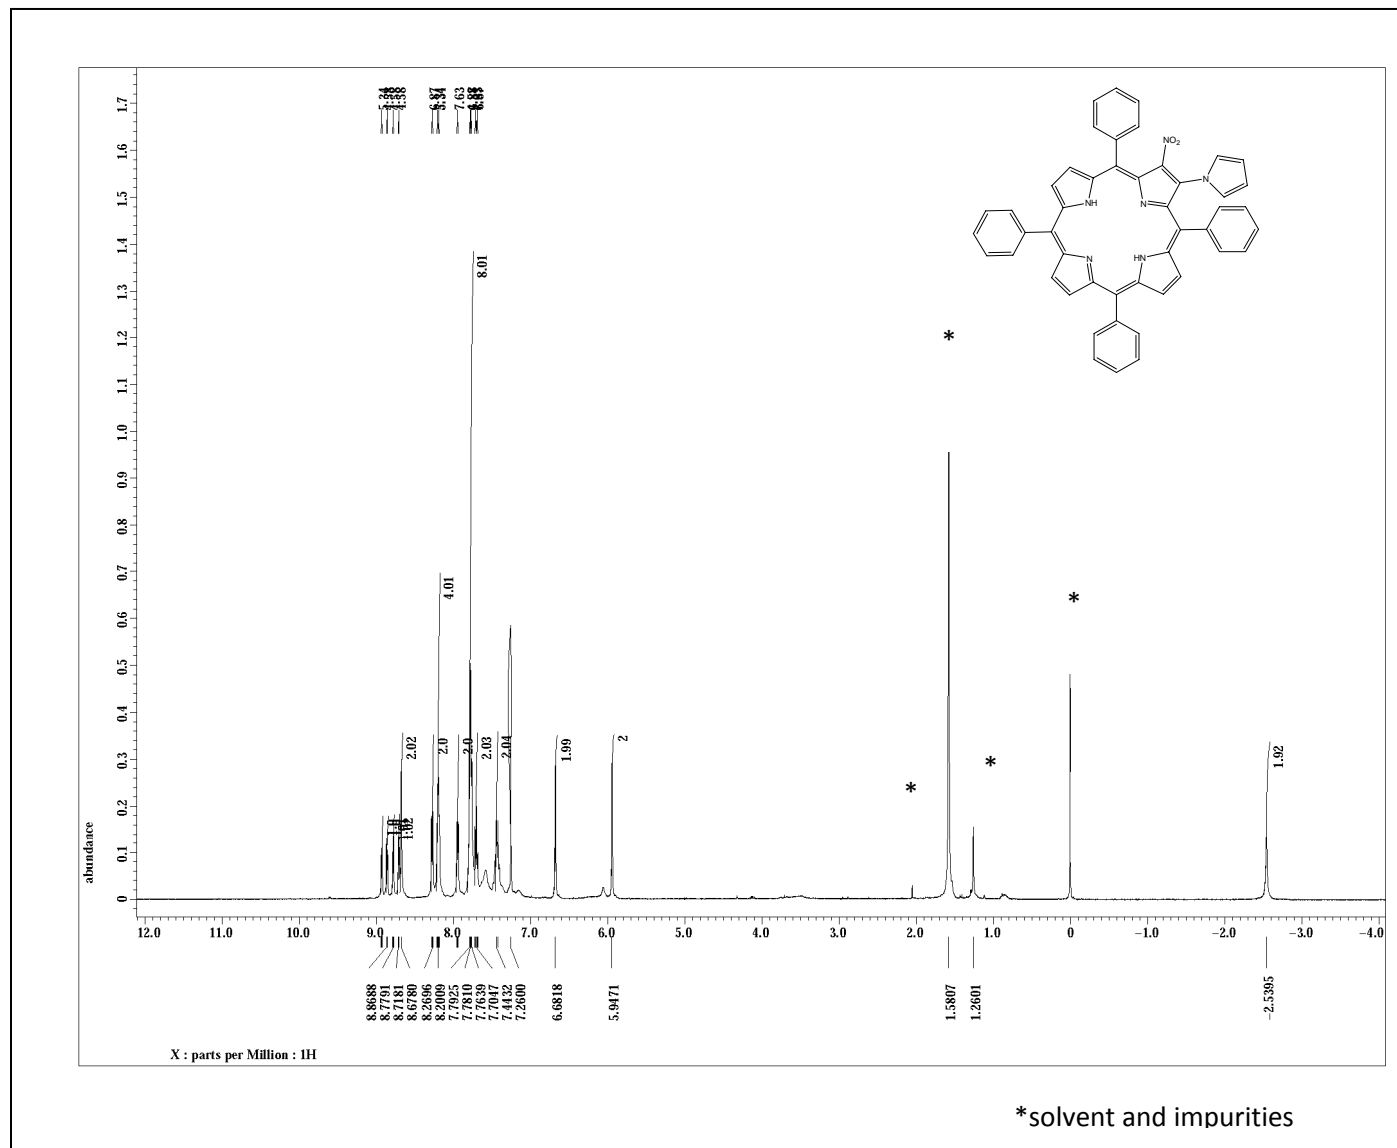

Figure S2.  $^1\text{H}$  NMR spectrum of 2-nitro-3-(pyrrol-1-yl)-5,10,15,20-tetraphenylporphyrin (10).

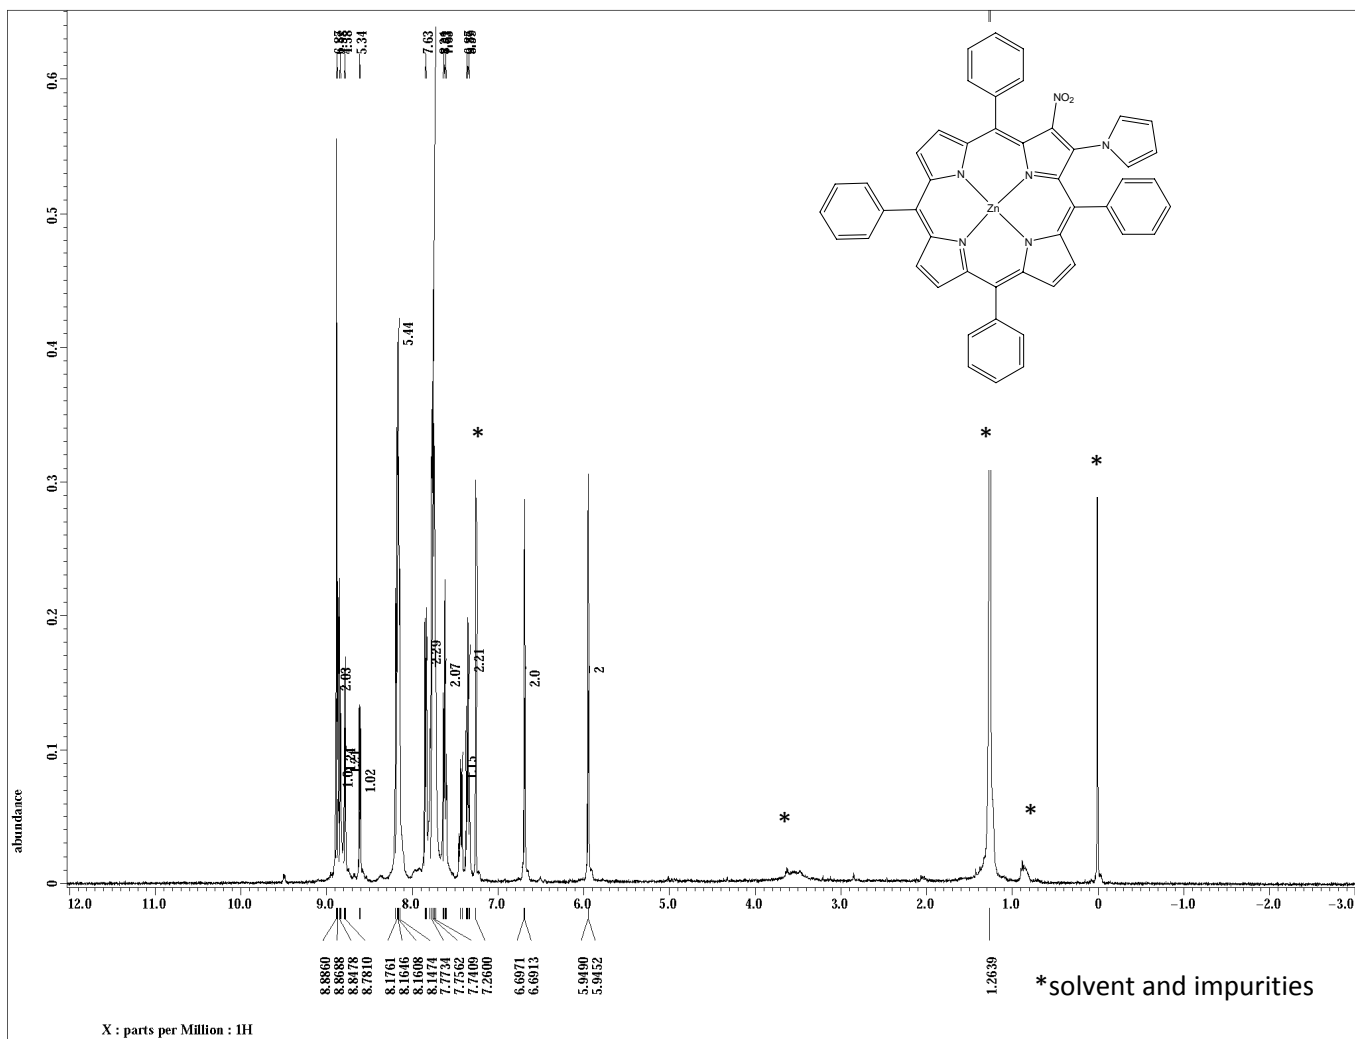

**Figure S3.**  $^1\text{H}$  NMR spectrum of zinc(II) 2-nitro-3-(pyrrol-1-yl)-5,10,15,20-tetraphenylporphyrin (**12**).

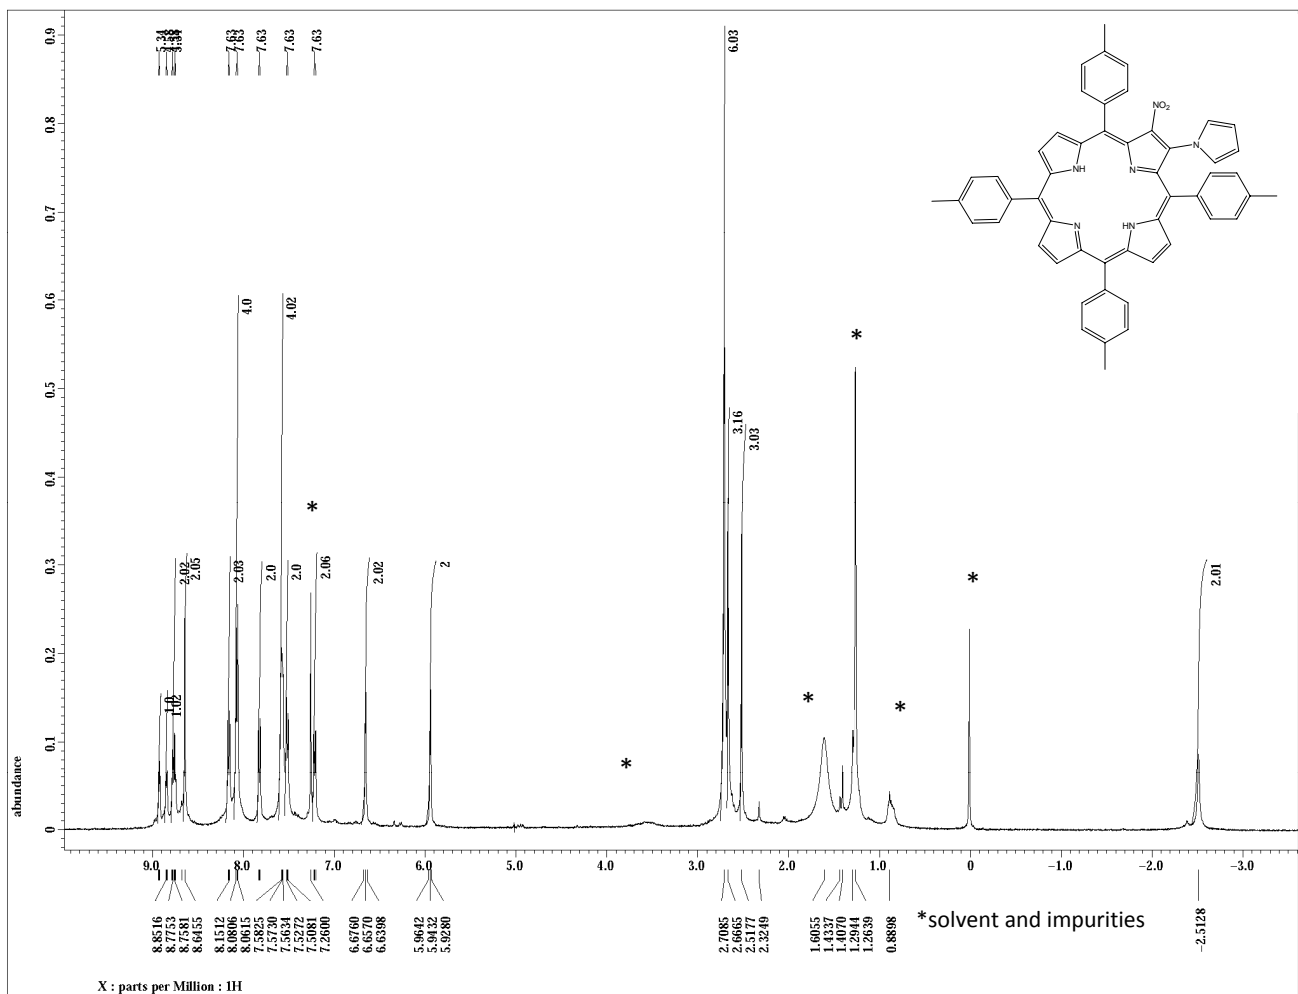

Figure S4.  $^1\text{H}$  NMR spectrum of 2-nitro-3-(pyrrol-1-yl)-5,10,15,20-tetra-*p*-tolylporphyrin (14).

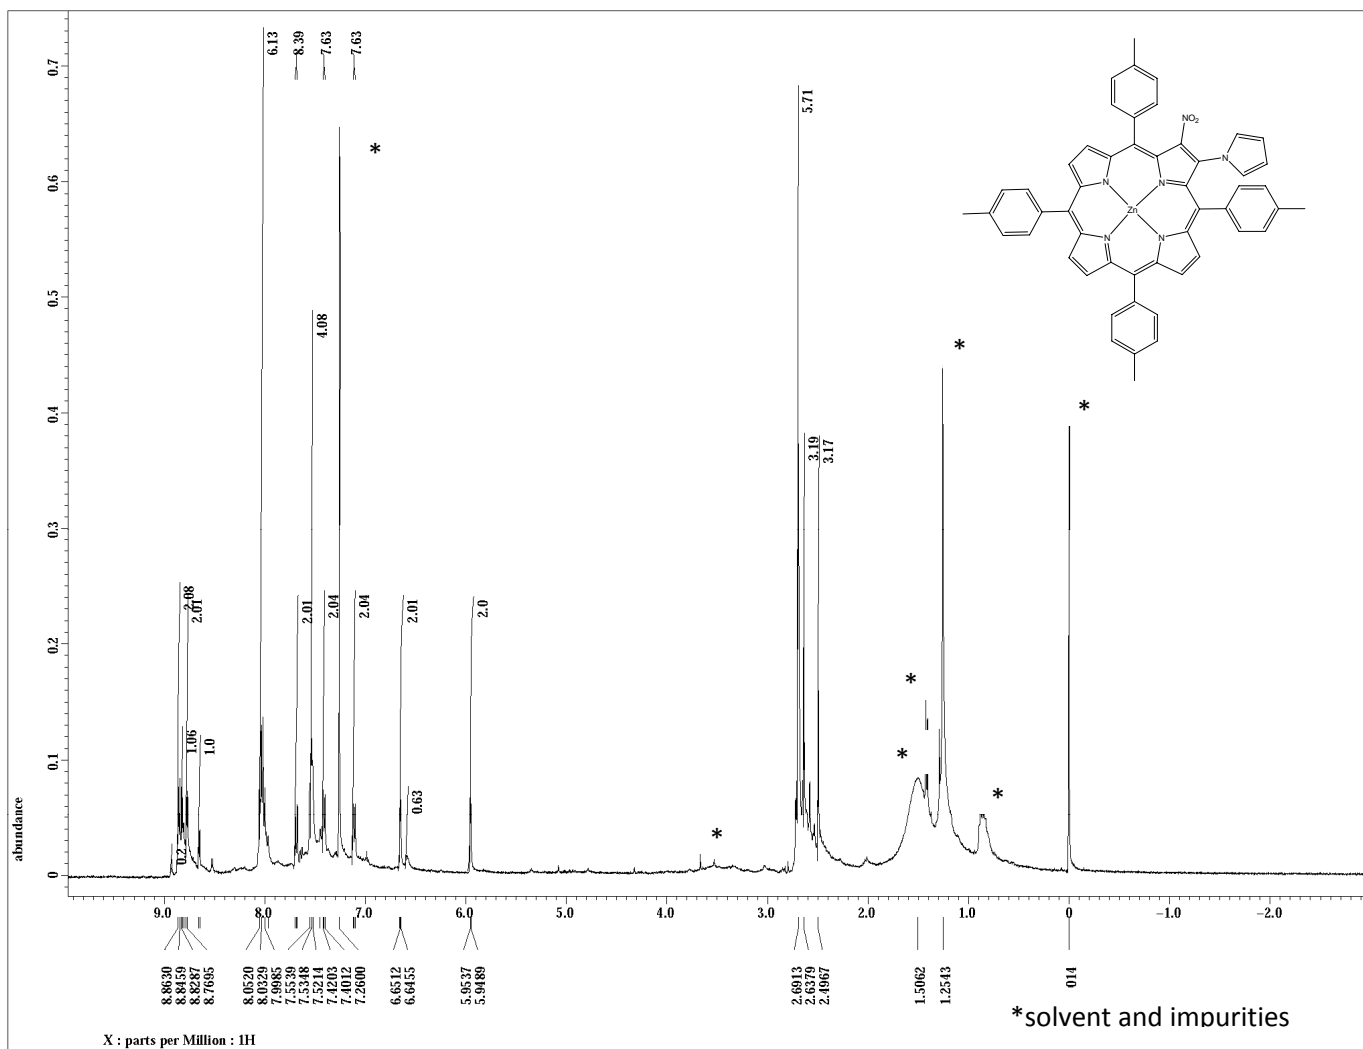

**Figure S5.**  $^1\text{H}$  NMR spectrum of zinc(II) 2-nitro-3-(pyrrol-1-yl)-5,10,15,20-tetra-*p*-tolylporphyrin (16).

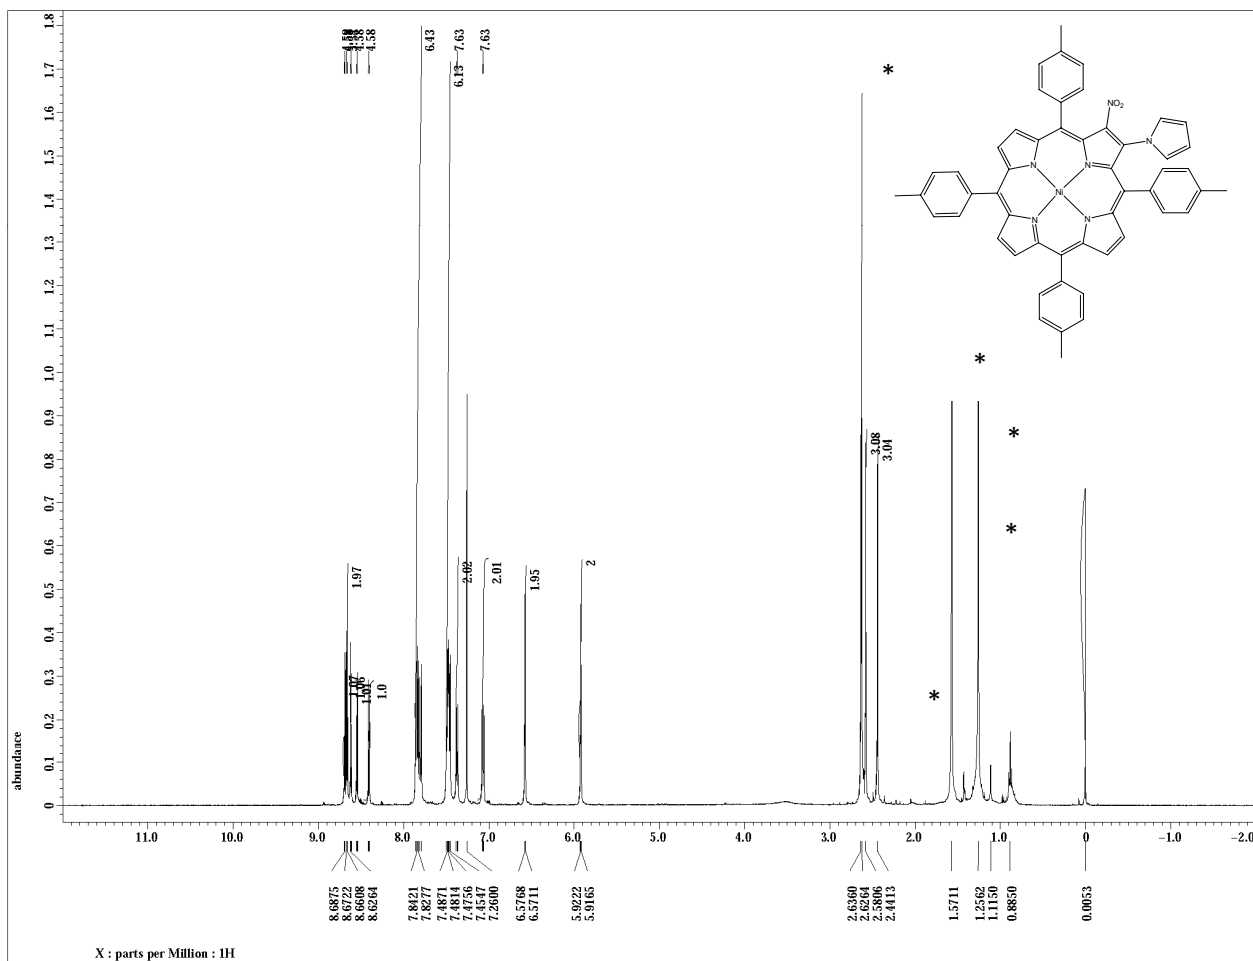

\*solvents and impurities

**Figure S6.**  $^1\text{H}$  NMR spectrum of nickel(II) 2-nitro -3-(pyrrol-1-yl)-5,10,15,20-tetra-*p*-tolylporphyrin (17).

|               |         |             |              |                 |                |                        |                     |
|---------------|---------|-------------|--------------|-----------------|----------------|------------------------|---------------------|
| Sample Name   | RT-11   | Position    | P1F6         | Instrument Name | 6530 QTOF LCMS | User Name              | lcmsdu-PC\admin     |
| Inj Vol       | 1       | InjPosition |              | SampleType      | Sample         | IRM Calibration Status | Success             |
| Data Filename | RT-11.d | ACQ Method  | 29.10.2014.m | Comment         |                | Acquired Time          | 12-11-2014 17:30:26 |

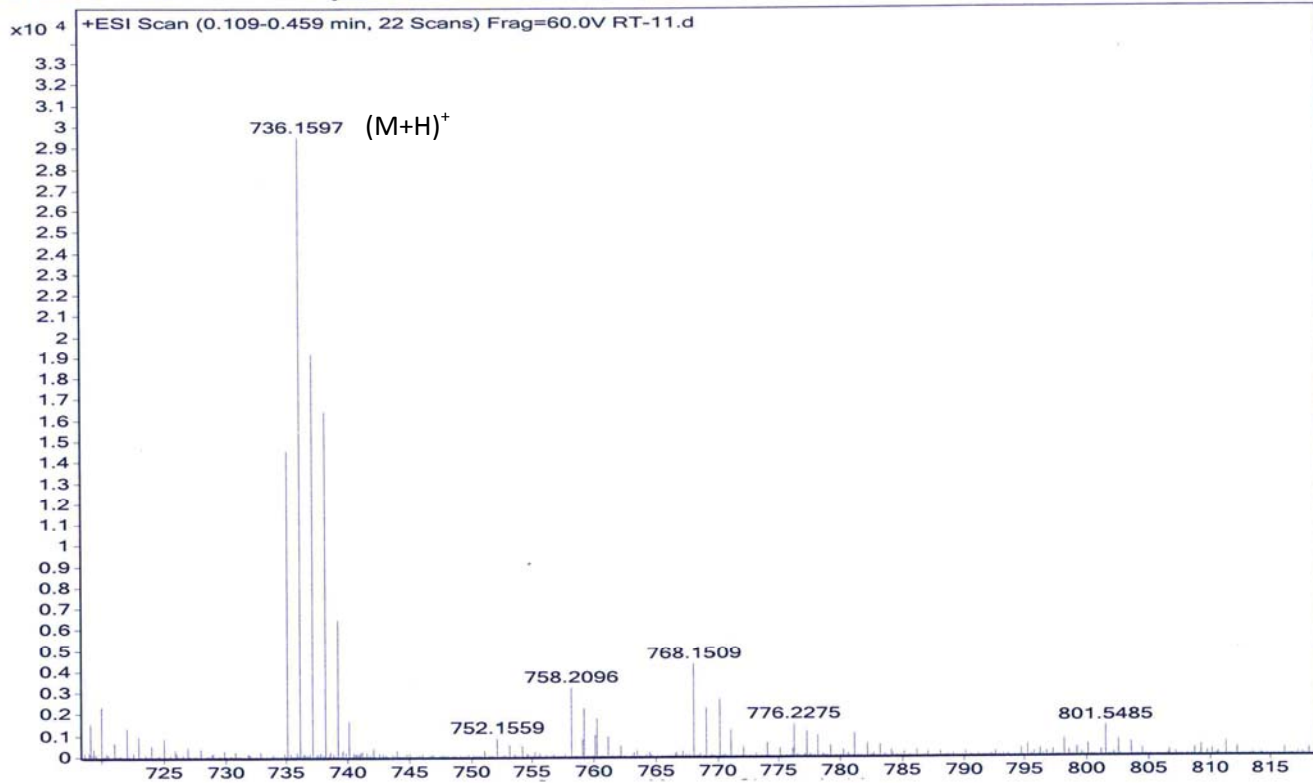

Figure S 7. ESI-HRMS of copper(II) 2-amino-3-nitro-5,10,15,20-tetraphenylporphyrin (3).



## Qualitative Compound Report

|                        |                |               |                     |
|------------------------|----------------|---------------|---------------------|
| Data File              | RT47.d         | Sample Name   | RT47                |
| Sample Type            | Sample         | Position      | P1C8                |
| Instrument Name        | 6530 QTOF LCMS | User Name     | lcmsdu-PC\admin     |
| Acq Method             | Union.m        | Acquired Time | 19-09-2014 14:39:47 |
| IRM Calibration Status | Success        | DA Method     | Default.m           |
| Comment                |                |               |                     |

|                |                             |
|----------------|-----------------------------|
| Sample Group   | Info.                       |
| Acquisition SW | 6200 series TOF/6500 series |
| Version        | Q-TOF B.05.01 (B5125)       |

### Compound Table

| Compound Label | RT    | Mass     | MFG Formula |
|----------------|-------|----------|-------------|
| Cpd 15: 0.193  | 0.193 | 791.5864 | > limit     |

| Compound Label | m/z      | RT    | Algorithm                 | Mass     |
|----------------|----------|-------|---------------------------|----------|
| Cpd 15: 0.193  | 792.5938 | 0.193 | Find by Molecular Feature | 791.5864 |

### MFE MS Spectrum

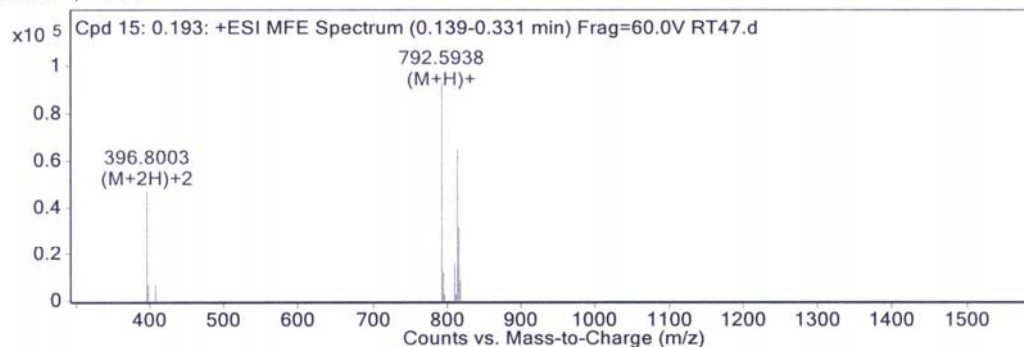

### MFE MS Zoomed Spectrum

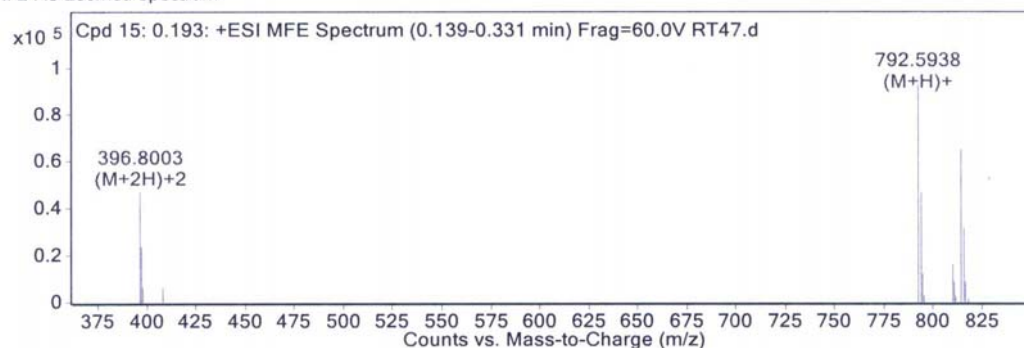

**Figure S8.** ESI-HRMS of copper(II) 2-amino-3-nitro-5,10,15,20-tetra-*p*-tolylporphyrin (7).

## Qualitative Compound Report

|                        |                |               |                     |
|------------------------|----------------|---------------|---------------------|
| Data File              | RT26.d         | Sample Name   | RT26                |
| Sample Type            | Sample         | Position      | P1F2                |
| Instrument Name        | 6530 QTOF LCMS | User Name     | lcmsdu-PC\admin     |
| Acq Method             | Union.m        | Acquired Time | 22-09-2014 16:36:39 |
| IRM Calibration Status | Success        | DA Method     | Default.m           |
| Comment                |                |               |                     |

|                |                             |
|----------------|-----------------------------|
| Sample Group   | Info.                       |
| Acquisition SW | 6200 series TOF/6500 series |
| Version        | Q-TOF B.05.01 (B5125)       |

### Compound Table

| Compound Label       | RT    | Mass     | Formula       | MFG Formula   | MFG Diff (ppm) | DB Formula    |
|----------------------|-------|----------|---------------|---------------|----------------|---------------|
| Cpd 5: C48 H38 N6 O2 | 0.227 | 730.3061 | C48 H38 N6 O2 | C48 H38 N6 O2 | -0.63          | C48 H38 N6 O2 |

| Compound Label       | m/z      | RT    | Algorithm                 | Mass     |
|----------------------|----------|-------|---------------------------|----------|
| Cpd 5: C48 H38 N6 O2 | 731.3134 | 0.227 | Find by Molecular Feature | 730.3061 |

### MFE MS Spectrum

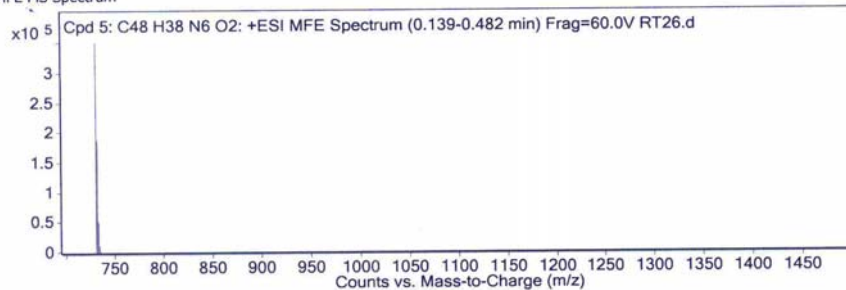

### MFE MS Zoomed Spectrum

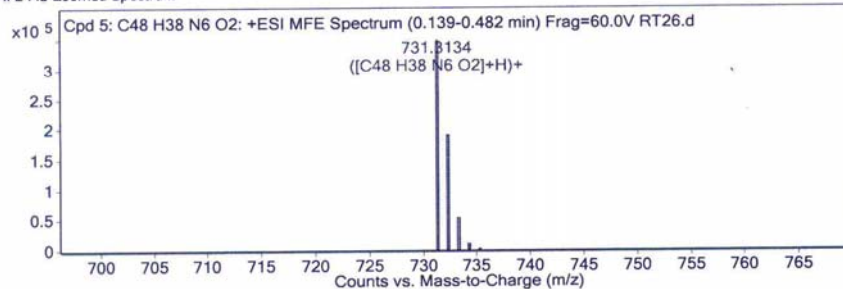

**Figure S9.** ESI-HRMS of 2-amino-3-nitro-5,10,15,20-tetra-*p*-tolylporphyrin (8).

|               |         |             |         |                 |                |                        |                 |
|---------------|---------|-------------|---------|-----------------|----------------|------------------------|-----------------|
| Sample Name   | RT-12   | Position    | P2C9    | Instrument Name | 6530 QTOF LCMS | User Name              | lcmsdu-PC\admi  |
| Inj Vol       | 1       | InjPosition |         | SampleType      | Sample         | IRM Calibration Status | Success         |
| Data Filename | RT-12.d | ACQ Method  | Union.m | Comment         |                | Acquired Time          | 27-08-2014 15:3 |

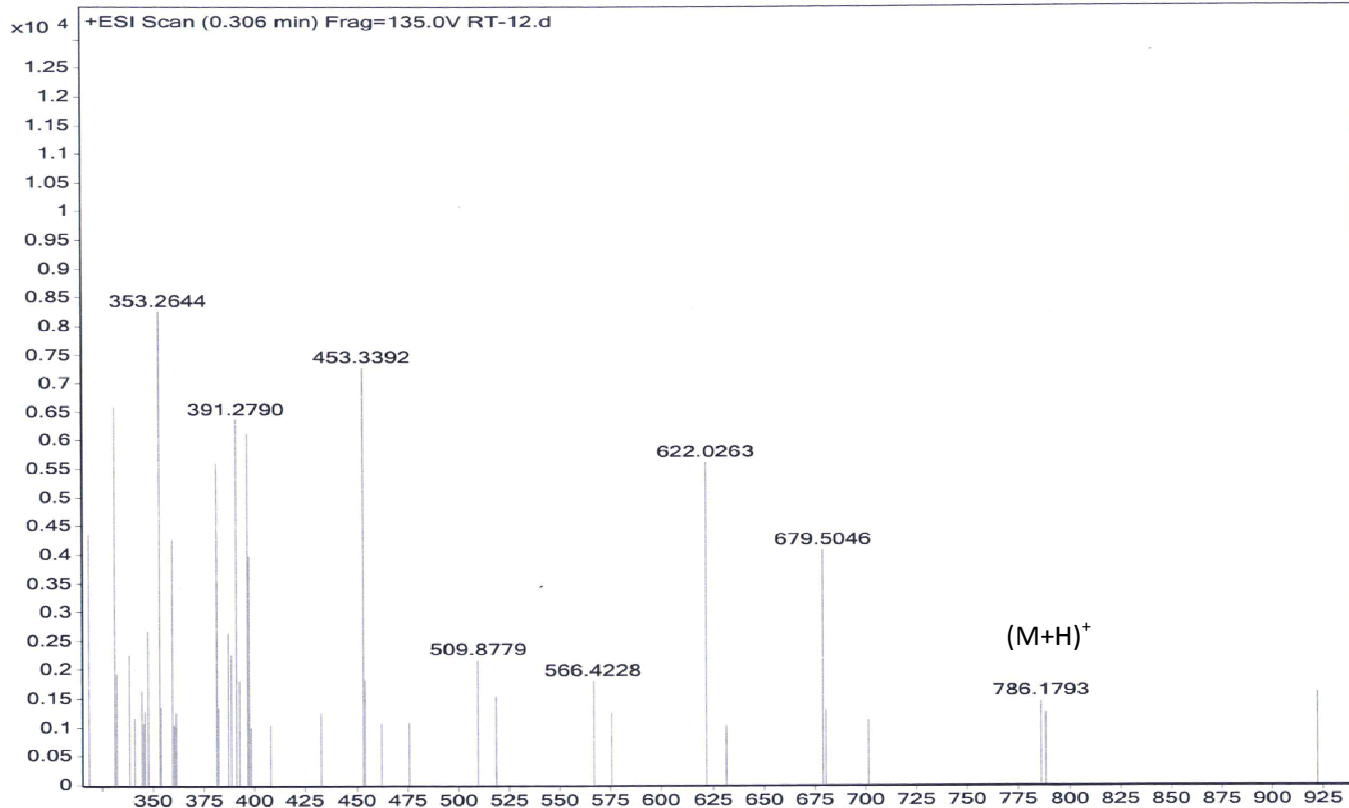

**Figure S10.** ESI-HRMS of copper(II) 2-nitro-3-(pyrrol-1-yl)-5,10,15,20-tetraphenylporphyrin (9).

|               |        |             |         |                 |                |                        |                     |
|---------------|--------|-------------|---------|-----------------|----------------|------------------------|---------------------|
| Sample Name   | RT48   | Position    | PIA4    | Instrument Name | 6530 QTOF LCMS | User Name              | lcmsdu-PC\admin     |
| Inj Vol       | 1      | InjPosition |         | SampleType      | Sample         | IRM Calibration Status | Success             |
| Data Filename | RT48.d | ACQ Method  | Union.m | Comment         |                | Acquired Time          | 02-09-2014 16:09:37 |

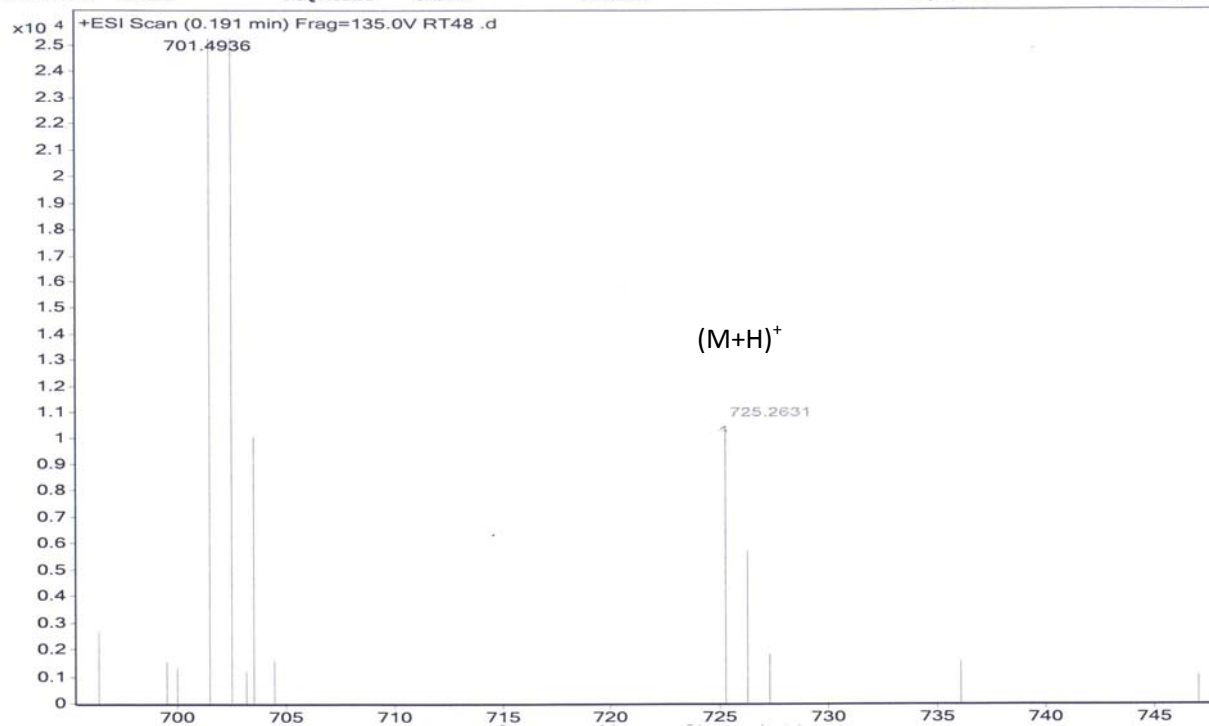

**Figure S11.** ESI-HRMS of 2-nitro-3-(pyrrol-1-yl)-5,10,15,20-tetraphenylporphyrin (**10**).

|               |          |             |         |                 |                |                        |                     |
|---------------|----------|-------------|---------|-----------------|----------------|------------------------|---------------------|
| Sample Name   | RT-13A   | Position    | PID2    | Instrument Name | 6530 QTOF LCMS | User Name              | lcmsdu-PC\admin     |
| Inj Vol       | 1        | InjPosition |         | SampleType      | Sample         | IRM Calibration Status | Success             |
| Data Filename | RT-13A.d | ACQ Method  | Union.m | Comment         |                | Acquired Time          | 03-09-2014 16:19:54 |

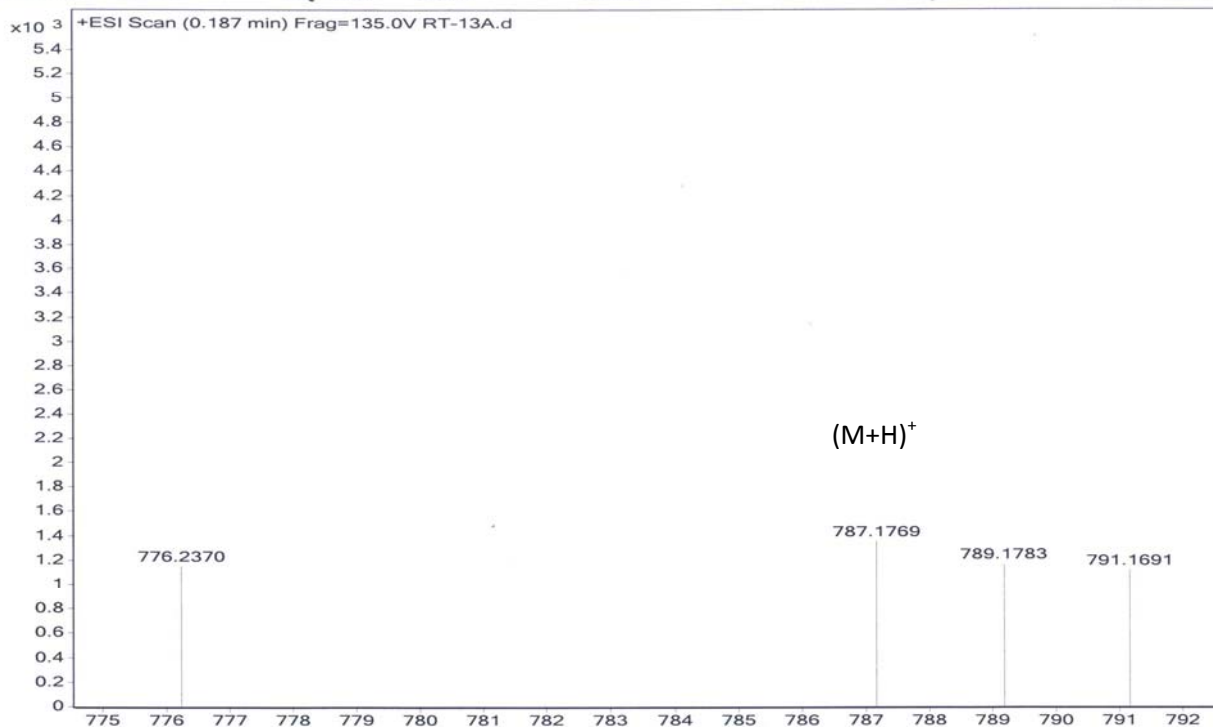

**Figure S12.** ESI-HRMS of zinc(II) 2-nitro-3-(pyrrol-1-yl)-5,10,15,20-tetraphenylporphyrin (**12**).

|               |        |             |         |                 |                |                        |                     |
|---------------|--------|-------------|---------|-----------------|----------------|------------------------|---------------------|
| Sample Name   | RT51   | Position    | P1B2    | Instrument Name | 6530 QTOF LCMS | User Name              | lcmsdu-PC\admin     |
| Inj Vol       | 5      | InjPosition |         | SampleType      | Sample         | IRM Calibration Status | Success             |
| Data Filename | RT51.d | ACQ Method  | Union.m | Comment         |                | Acquired Time          | 09-09-2014 16:12:00 |

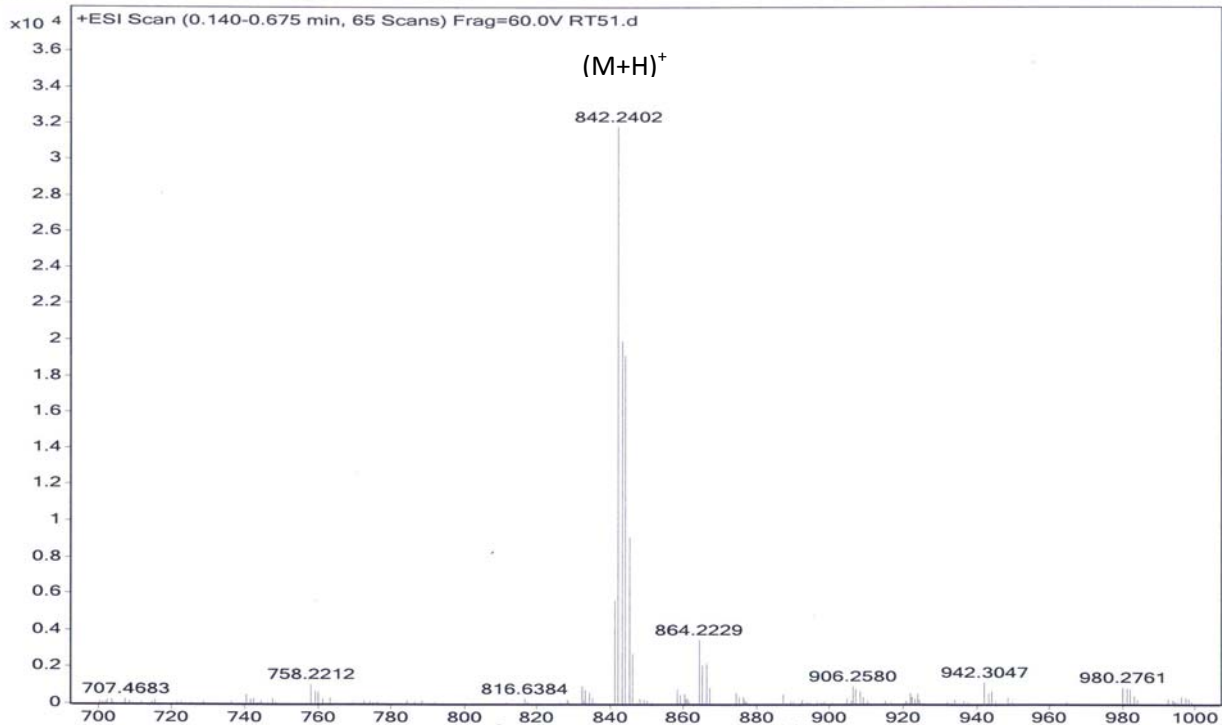

**Figure S13.** ESI-HRMS of copper(II) 2-nitro-3-(pyrrol-1-yl)-5,10,15,20-tetra-*p*-tolylporphyrin (13).

## Qualitative Compound Report

|                               |                |                      |                     |
|-------------------------------|----------------|----------------------|---------------------|
| <b>Data File</b>              | RT54.d         | <b>Sample Name</b>   | RT54                |
| <b>Sample Type</b>            | Sample         | <b>Position</b>      | P2A2                |
| <b>Instrument Name</b>        | 6530 QTOF LCMS | <b>User Name</b>     | lcmsdu-PC\admin     |
| <b>Acq Method</b>             | Union.m        | <b>Acquired Time</b> | 10-09-2014 15:55:17 |
| <b>IRM Calibration Status</b> | Success        | <b>DA Method</b>     | Default.m           |
| <b>Comment</b>                |                |                      |                     |

|                       |                             |              |
|-----------------------|-----------------------------|--------------|
| <b>Sample Group</b>   |                             | <b>Info.</b> |
| <b>Acquisition SW</b> | 6200 series TOF/6500 series |              |
| <b>Version</b>        | Q-TOF B.05.01 (B5125)       |              |

### Compound Table

| Compound Label | RT    | Mass     | MFG Formula |
|----------------|-------|----------|-------------|
| Cpd 9: 0.283   | 0.283 | 780.3199 | > limit     |

| Compound Label | m/z      | RT    | Algorithm                 | Mass     |
|----------------|----------|-------|---------------------------|----------|
| Cpd 9: 0.283   | 781.3272 | 0.283 | Find by Molecular Feature | 780.3199 |

### MFE MS Spectrum

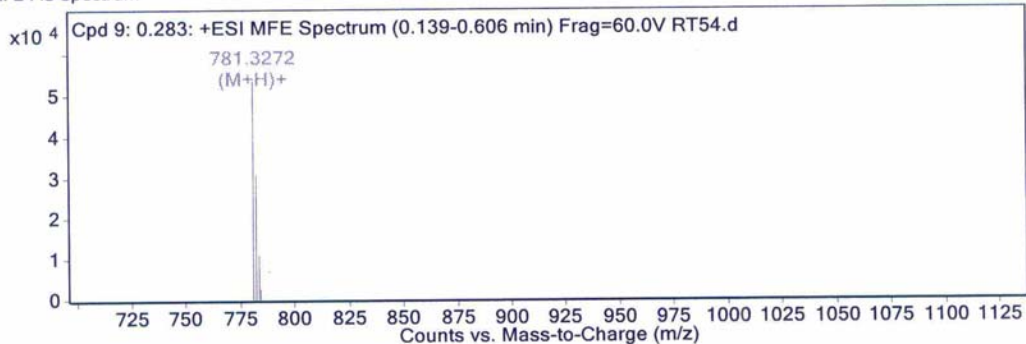

### MFE MS Zoomed Spectrum

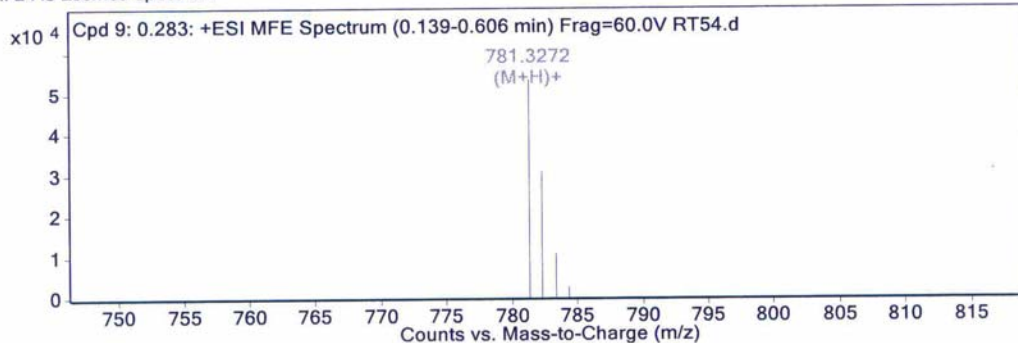

**Figure S14.** ESI-HRMS of 2-nitro-3-(pyrrol-1-yl)-5,10,15,20-tetra-*p*-tolylporphyrin (**14**).

|               |         |             |         |                 |                |                        |                     |
|---------------|---------|-------------|---------|-----------------|----------------|------------------------|---------------------|
| Sample Name   | RT-49   | Position    | P1B9    | Instrument Name | 6530 QTOF LCMS | User Name              | lcmsdu-PC\admin     |
| Inj Vol       | 1       | InjPosition |         | SampleType      | Sample         | IRM Calibration Status | Success             |
| Data Filename | RT-49.d | ACQ Method  | Union.m | Comment         |                | Acquired Time          | 16-09-2014 16:55:47 |

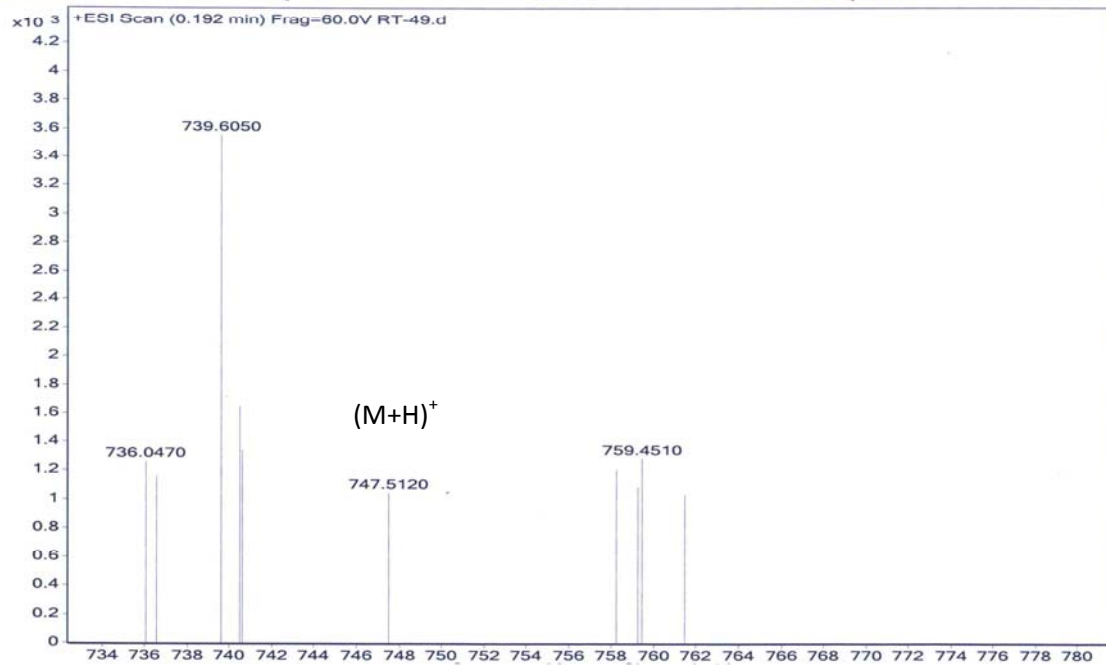

**Figure S15.** ESI-HRMS of magnesium(II) 2-nitro-3-(pyrrol-1-yl)-5,10,15,20-tetraphenylporphyrin (**15**).



|               |         |             |         |                 |                |                        |                     |
|---------------|---------|-------------|---------|-----------------|----------------|------------------------|---------------------|
| Sample Name   | RT-55   | Position    | PIF8    | Instrument Name | 6530 QTOF LCMS | User Name              | lcmsdu-PC\admin     |
| Inj Vol       | 1       | InjPosition |         | SampleType      | Sample         | IRM Calibration Status | Success             |
| Data Filename | RT-55.d | ACQ Method  | Union.m | Comment         |                | Acquired Time          | 12-09-2014 15:25:39 |

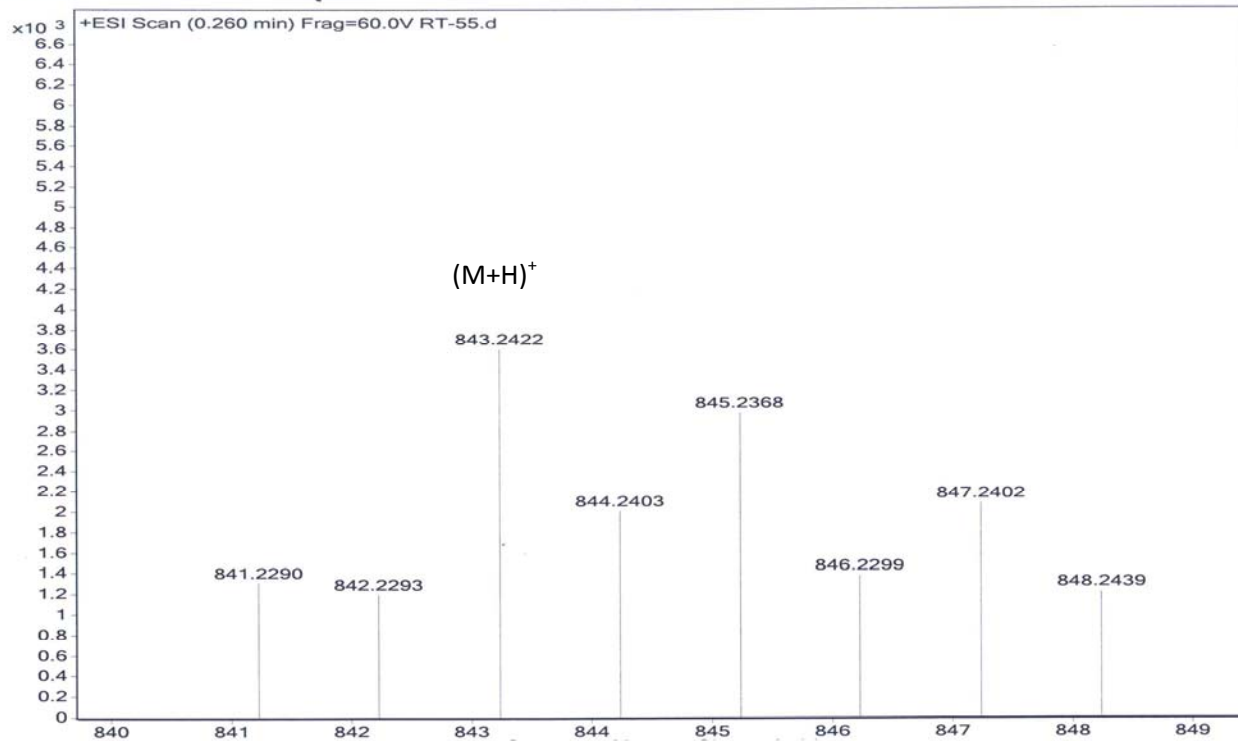

**Figure S16.** ESI-HRMS of zinc(II) 2-nitro-3-(pyrrol-1-yl)-5,10,15,20-tetra-*p*-tolylporphyrin (16).

|               |        |             |         |                 |                |                        |                     |
|---------------|--------|-------------|---------|-----------------|----------------|------------------------|---------------------|
| Sample Name   | RT57   | Position    | PIA8    | Instrument Name | 6530 QTOF LCMS | User Name              | lcmsdu-PC\admin     |
| Inj Vol       | 1      | InjPosition |         | SampleType      | Sample         | IRM Calibration Status | Success             |
| Data Filename | RT57.d | ACQ Method  | Union.m | Comment         |                | Acquired Time          | 08-09-2014 16:05:12 |

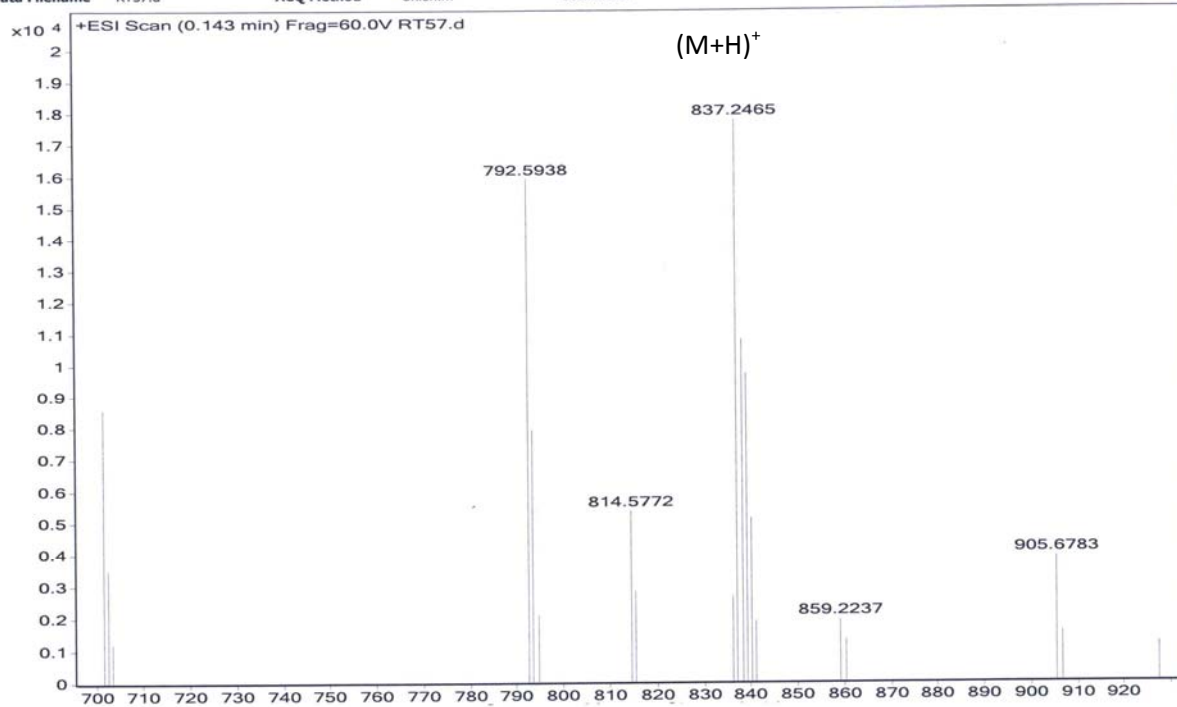

**Figure S17.** ESI-HRMS of nickel(II) 2-nitro-3-(pyrrol-1-yl)-5,10,15,20-tetra-*p*-tolylporphyrin (17).

|               |         |             |         |                 |                |                        |                     |
|---------------|---------|-------------|---------|-----------------|----------------|------------------------|---------------------|
| Sample Name   | RT-56   | Position    | P1E2    | Instrument Name | 6530 QTOF LCMS | User Name              | lcmsdu-PC\admin     |
| Inj Vol       | 1       | InjPosition |         | SampleType      | Sample         | IRM Calibration Status | Success             |
| Data Filename | RT-56.d | ACQ Method  | Union.m | Comment         |                | Acquired Time          | 16-09-2014 16:46:08 |

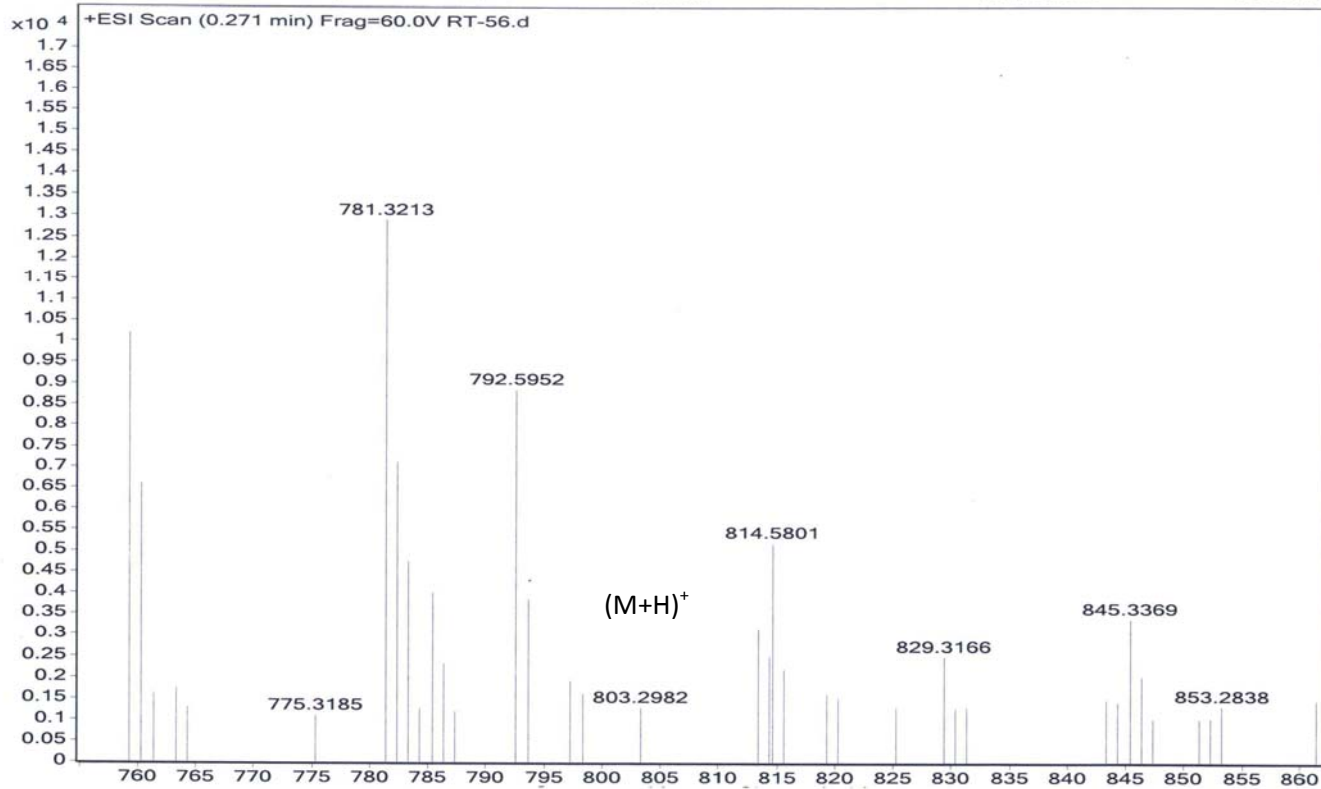

**Figure S18.** ESI-HRMS of magnesium(II) 2-nitro-3-(pyrrol-1-yl)-5,10,15,20-tetra-*p*-tolylporphyrin (**18**).

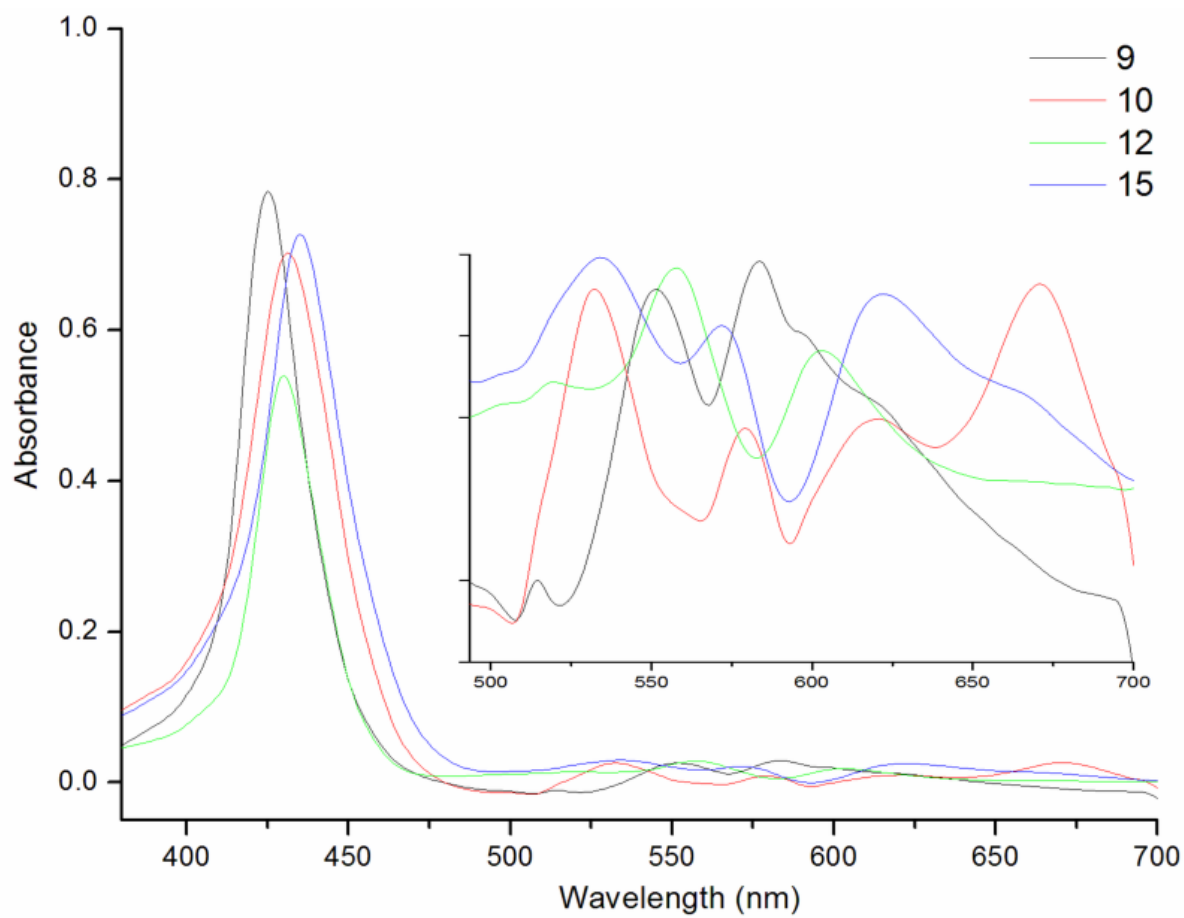

**Figure S 19.** UV-Vis spectra of *meso*-tetraphenylporphyrins (**9**, **10**, **12** and **15**).

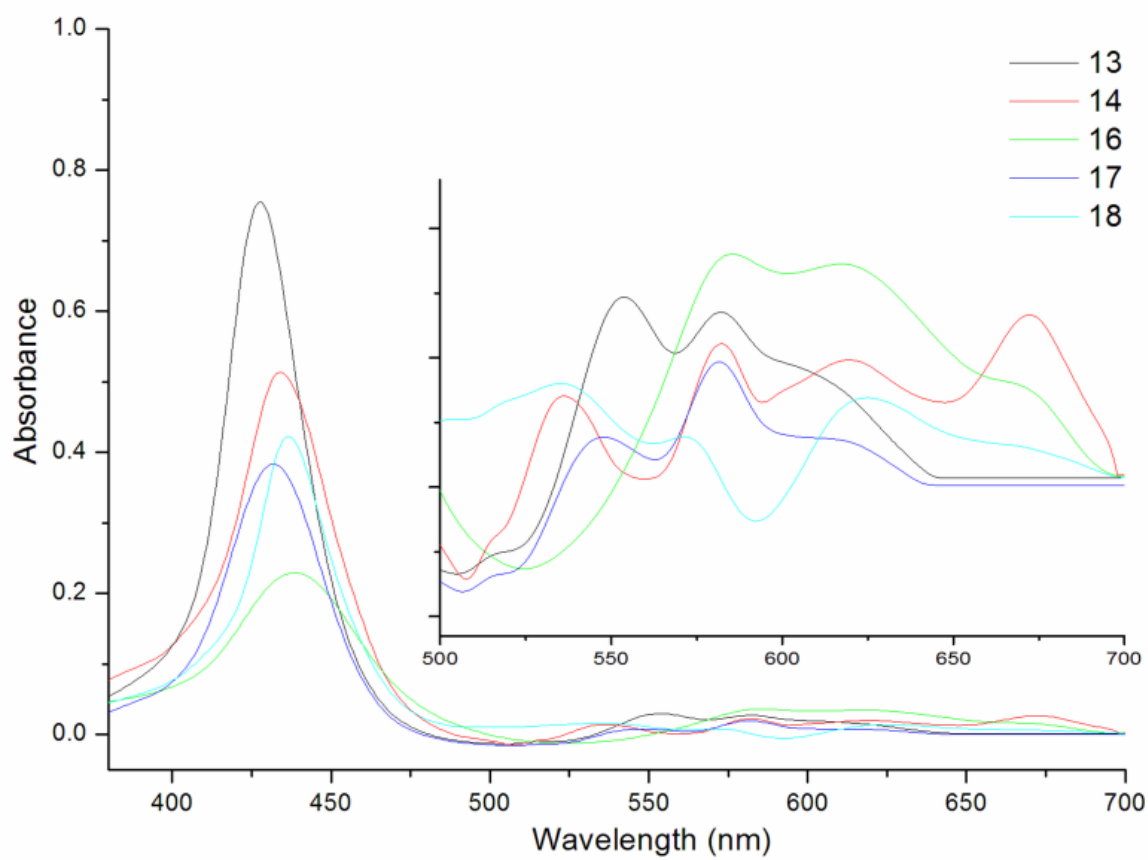

**Figure S 20.** UV-Vis spectra of *meso*-tetra-*p*-tolylporphyrins (13, 14, 16, 17 and 18).

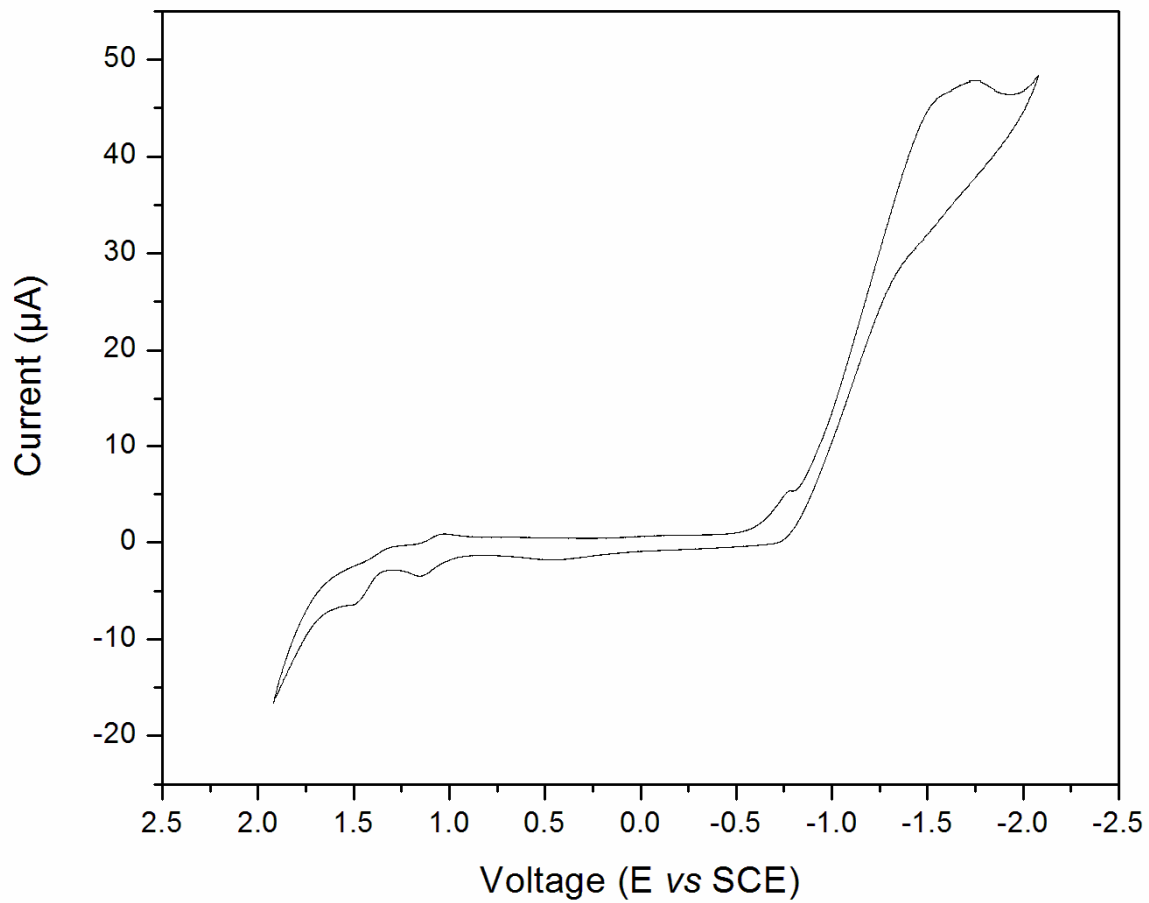

**Figure S 21.** Cyclic voltammograms of copper (II) 2-nitro-3-(pyrrol-1-yl)-5,10,15,20-tetraphenylporphyrin (**9**) in  $\text{CH}_2\text{Cl}_2 + 0.1\text{M Bu}_4\text{NPF}_6$  at a scan rate  $\nu = 0.05\text{Vs}^{-1}$ .

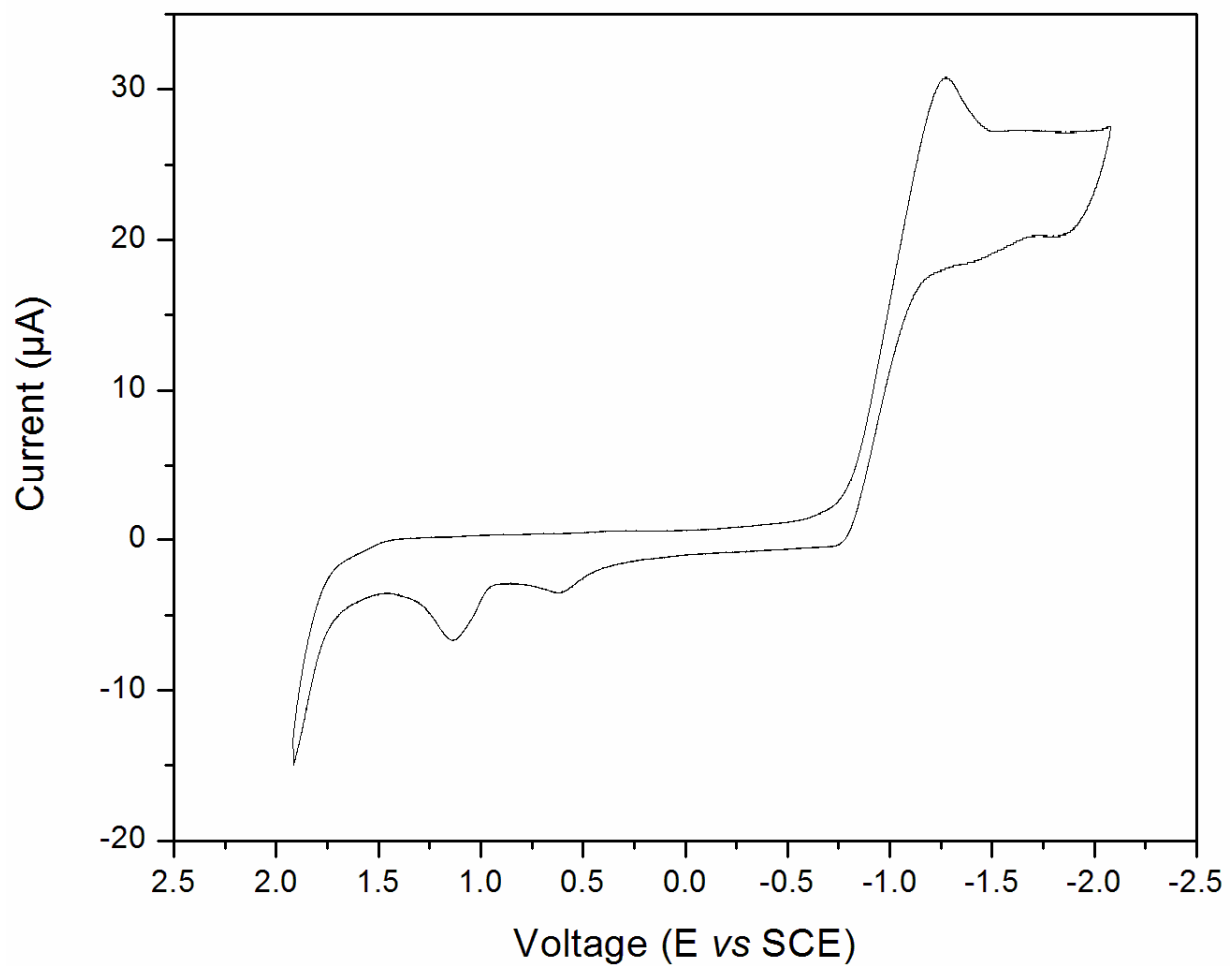

**Figure S 22.** Cyclic voltammograms of 2-nitro-3-(pyrrol-1-yl)-5,10,15,20-tetraphenylporphyrin (**10**) in  $\text{CH}_2\text{Cl}_2 + 0.1\text{M Bu}_4\text{NPF}_6$  at a scan rate  $\nu = 0.05\text{V s}^{-1}$ .

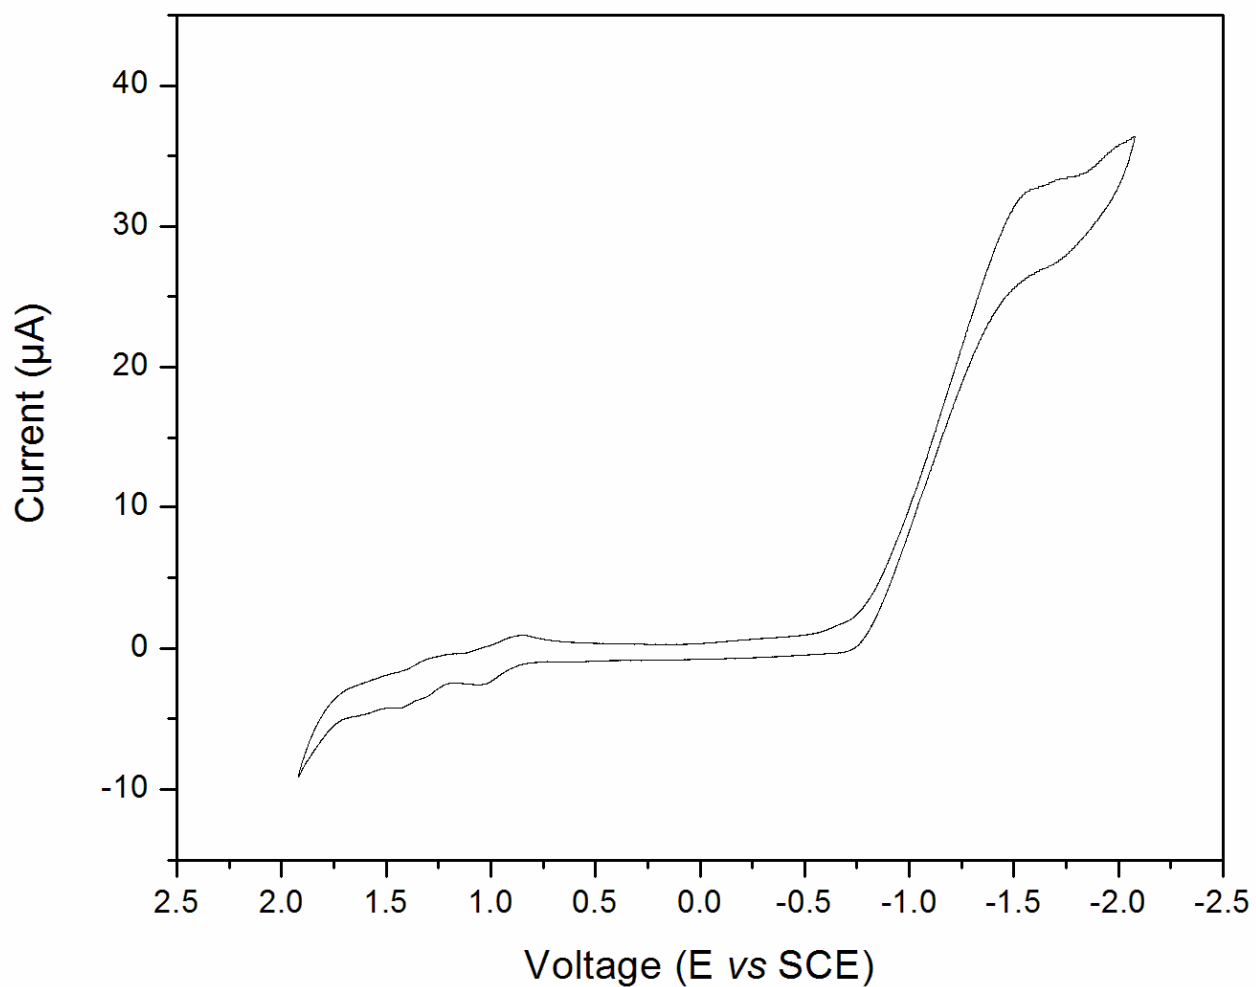

**Figure S 23.** Cyclic voltammograms of zinc (II) 2-nitro-3-(pyrrol-1-yl)-5,10,15,20-tetraphenylporphyrin (**12**) in  $\text{CH}_2\text{Cl}_2 + 0.1\text{M Bu}_4\text{NPF}_6$  at a scan rate  $\nu = 0.05\text{Vs}^{-1}$ .



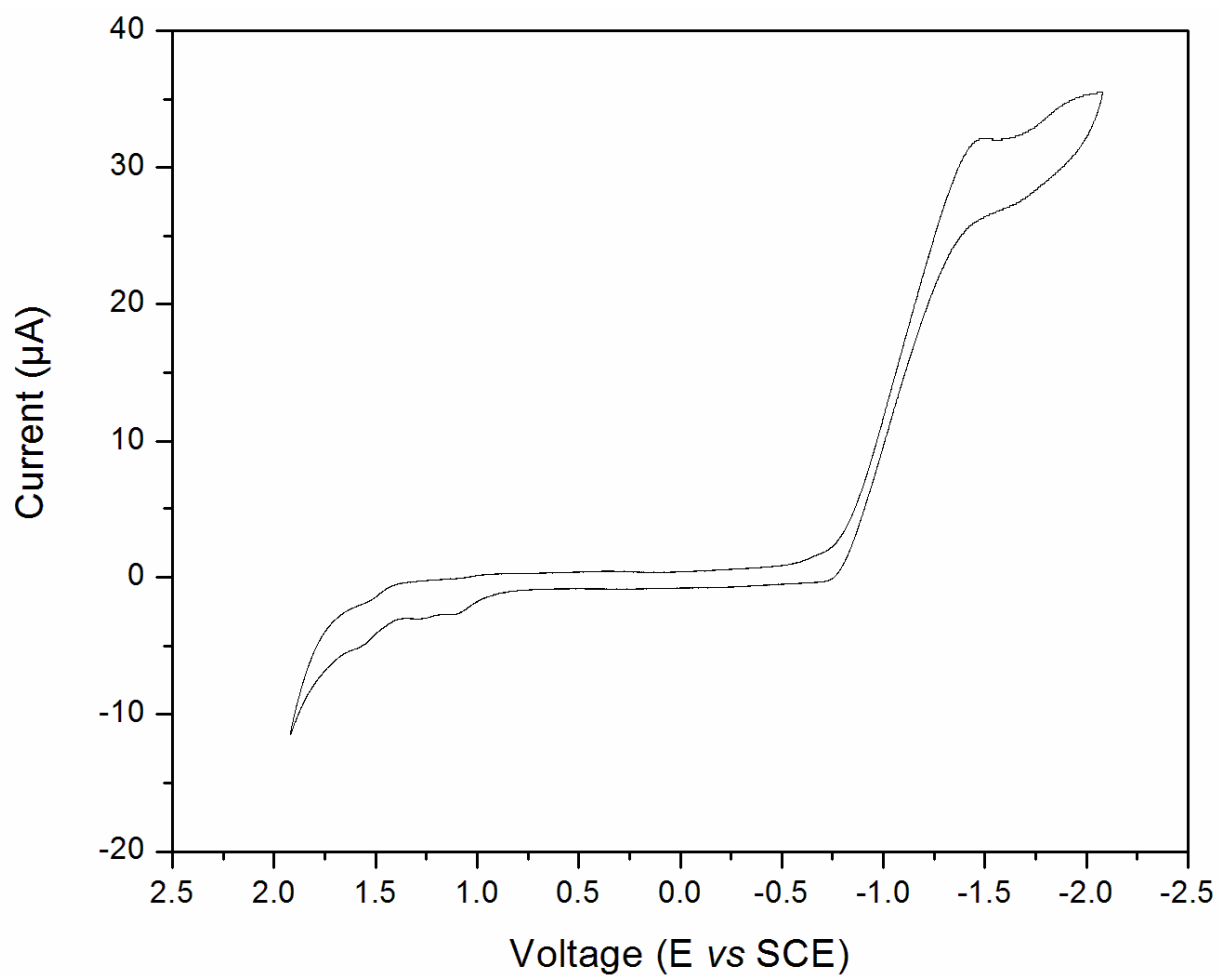

**Figure S 24.** Cyclic voltammograms of 2-nitro-3-(pyrrol-1-yl)-5,10,15,20-tetra-*p*-tolylporphyrin (**14**) in  $\text{CH}_2\text{Cl}_2 + 0.1\text{M Bu}_4\text{NPF}_6$  at a scan rate  $\nu = 0.05\text{V s}^{-1}$ .

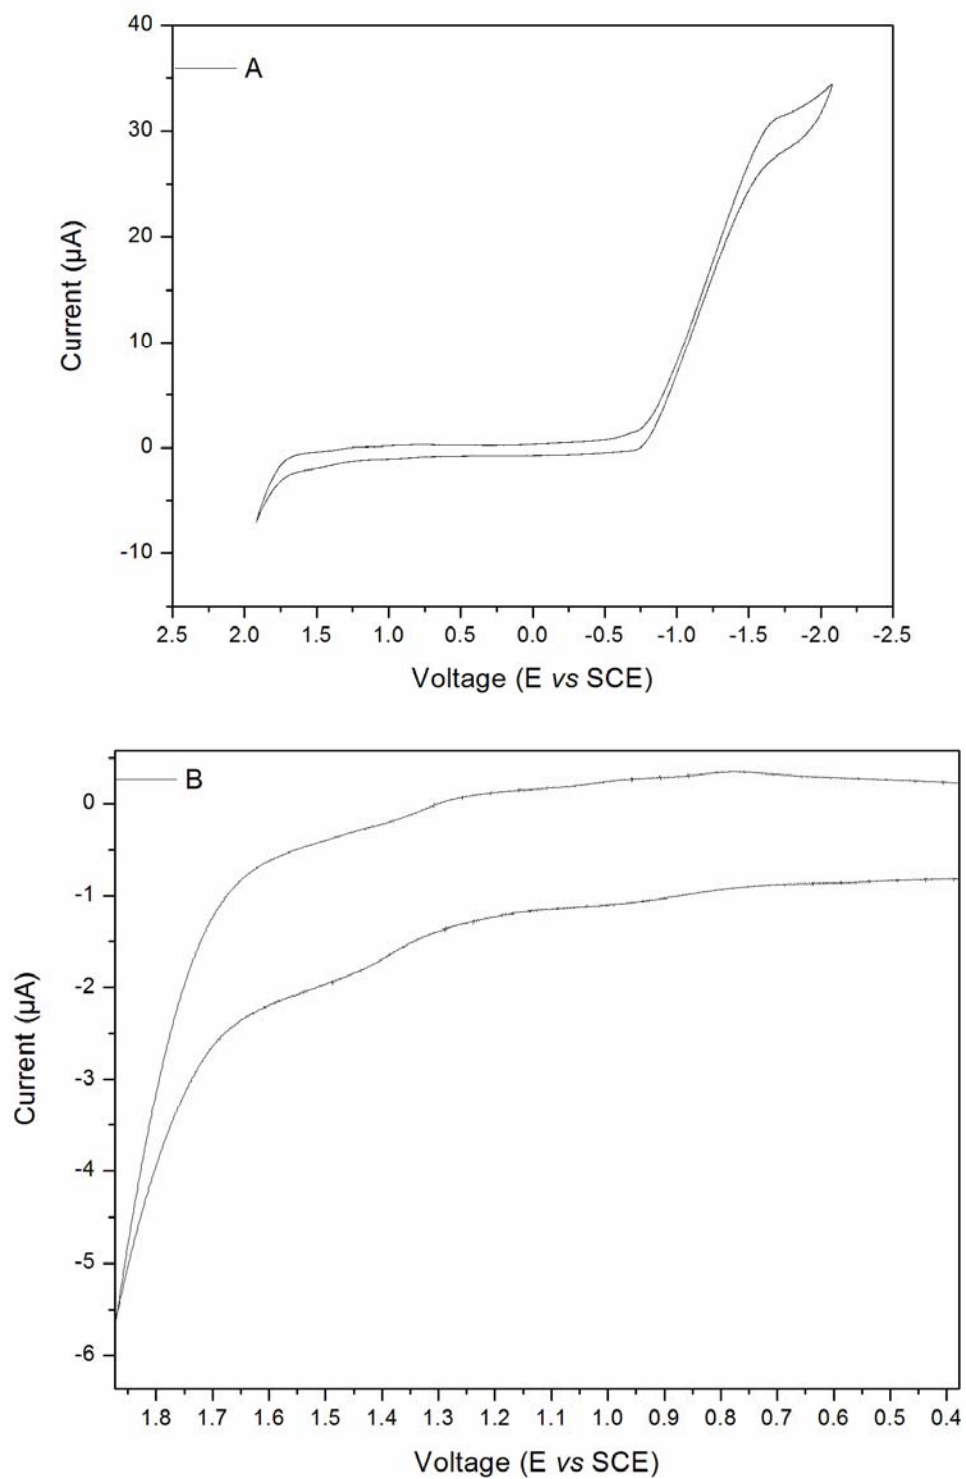

**Figure S 25.** Cyclic voltammograms of zinc (II) 2-nitro-3-(pyrrol-1-yl)-5,10,15,20-tetra-*p*-tolylporphyrin (**16**, **Fig. A**) in  $\text{CH}_2\text{Cl}_2 + 0.1\text{M Bu}_4\text{NPF}_6$  at a scan rate  $\nu = 0.05\text{Vs}^{-1}$ . Figure B shows the expansion of cyclic voltammograms from 0.4 -1.8 V.
